# Supplementary material
Source: PubMed Central journal article supplement (PMC2151704)
Supplement: plntphys_pp.107.108985_3.pdf [file plntphys_pp.107.108985_3.pdf]

## Supplementary Figures

**Figure 1.** Immunological detection of storage proteins (barley lectin, vicilin) and TIPs in root tips of 10 day old barley (A-C) and pea (D-F) seedlings. A) barley lectin; B, E)  $\alpha$ -TIP labeled with  $\alpha$ -TIP peptide antiserum, Jauh et al., 1998; C, F)  $\gamma$ -TIP labeled with  $\gamma$ -TIP peptide antiserum, Suga and Maeshima, 2004) Bars = 100  $\mu$ m.

**Figure 2.** Immunological detection of V-ATPase in root tips of 3 day old barley (A) and pea (B) seedlings. Bars = 100  $\mu$ m.
