# Supplementary material
Source: PubMed Central journal article supplement (PMC2151704)

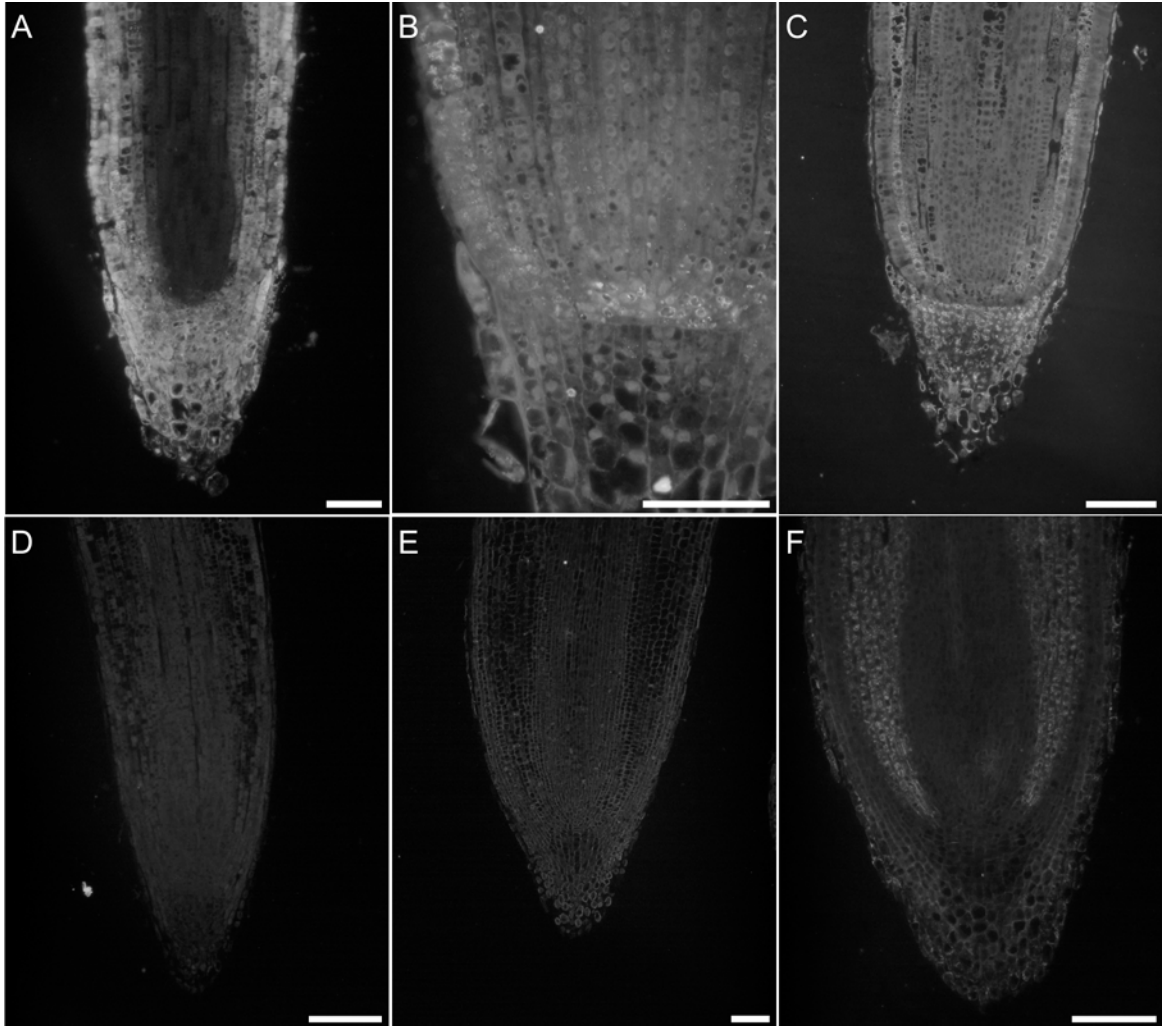

Supplement: plntphys_pp.107.108985_1.pdf [file plntphys_pp.107.108985_1.pdf]

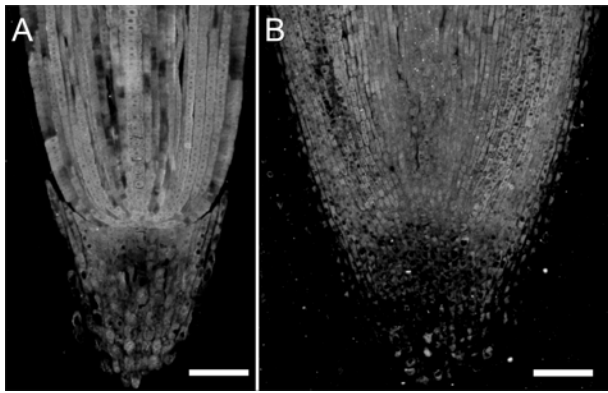

Supplement: plntphys_pp.107.108985_2.pdf [file plntphys_pp.107.108985_2.pdf]
